# Supplementary material for: Switching Order after Failures in Symmetric Protective Electrical Circuits with Triple Modal Reservation
Source: MDPI journal article supplement (doi:10.3390/sym13061074), 2021-06-16
Supplement: s1 [file s1]

Table S1.  $U_{\max}$  values at the end of an active conductor after various failures for the structure with the original and optimized (sequentially) parameter sets.

| Option | After failure 1 | $U_{\max}$ , V | After failure 2 | $U_{\max}$ , V | After failure 3  | $U_{\max}$ , V |
|--------|-----------------|----------------|-----------------|----------------|------------------|----------------|
| 1      | R-OC, R-R, R-R  | 0.283, 0.271   | R-OC, R-OC, R-R | 0.295, 0.291   | R-OC, R-OC, R-OC | 0.327, 0.315   |
|        |                 |                |                 |                | R-OC, OC-R, R-OC | 0.320, 0.311   |
|        |                 |                | R-OC, OC-R, R-R | 0.295, 0.292   | R-OC, R-SC, R-OC | 0.308, 0.303   |
|        |                 |                | R-OC, R-SC, R-R | 0.319, 0.311   | R-OC, SC-R, R-OC | 0.304, 0.301   |
|        |                 |                | R-OC, SC-R, R-R | 0.324, 0.316   | R-SC, R-SC, R-OC | 0.307, 0.302   |
|        |                 |                |                 |                | R-SC, SC-R, R-OC | 0.321, 0.313   |
|        | R-SC, R-R, R-R  | 0.284, 0.274   | R-SC, R-SC, R-R | 0.299, 0.298   | R-SC, R-OC, R-OC | 0.305, 0.307   |
|        |                 |                | R-SC, SC-R, R-R | 0.309, 0.304   | R-SC, OC-R, R-OC | 0.311, 0.312   |
|        |                 |                | R-SC, R-OC, R-R | 0.315, 0.315   | R-OC, R-OC, R-SC | 0.277, 0.286   |
|        |                 |                | R-SC, OC-R, R-R | 0.321, 0.319   | R-OC, OC-R, R-SC | 0.269, 0.283   |
|        |                 |                |                 |                | R-OC, R-SC, R-SC | 0.330, 0.319   |
|        |                 |                |                 |                |                  |                |
| 2      | R-R, R-OC, R-R  | 0.279, 0.290   | R-R, R-OC, R-OC | 0.281, 0.282   | R-OC, SC-R, R-SC | 0.346, 0.331   |
|        |                 |                | R-R, R-OC, OC-R | 0.276, 0.279   | R-SC, R-SC, R-SC | 0.290, 0.293   |
|        |                 |                | R-R, R-OC, R-SC | 0.297, 0.304   | R-SC, SC-R, R-SC | 0.294, 0.294   |
|        |                 |                | R-R, R-OC, SC-R | 0.298, 0.304   | R-SC, R-OC, R-SC | 0.327, 0.323   |
|        |                 |                |                 |                | R-SC, OC-R, R-SC | 0.333, 0.326   |
|        |                 |                |                 |                |                  |                |
|        | R-R, R-SC, R-R  | 0.285, 0.289   | R-R, R-SC, R-SC | 0.296, 0.296   | R-OC, R-OC, SC-R | 0.275, 0.278   |
|        |                 |                | R-R, R-SC, SC-R | 0.305, 0.302   | R-OC, OC-R, SC-R | 0.274, 0.275   |
|        |                 |                | R-R, R-SC, R-OC | 0.280, 0.285   | R-OC, R-SC, SC-R | 0.341, 0.326   |
|        |                 |                | R-R, R-SC, OC-R | 0.285, 0.290   | R-OC, SC-R, SC-R | 0.336, 0.323   |
|        |                 |                |                 |                | R-SC, R-SC, SC-R | 0.278, 0.284   |
|        |                 |                |                 |                |                  |                |
| 3      | R-R, R-R, R-OC  | 0.250, 0.249   | R-OC, R-R, R-OC | 0.282, 0.268   | R-SC, SC-R, SC-R | 0.293, 0.295   |
|        |                 |                | OC-R, R-R, R-OC | 0.278, 0.263   | R-SC, R-OC, SC-R | 0.337, 0.330   |
|        |                 |                | R-SC, R-R, R-OC | 0.281, 0.269   | R-SC, OC-R, SC-R | 0.343, 0.334   |
|        |                 |                | SC-R, R-R, R-OC | 0.287, 0.273   | R-OC, R-OC, OC-R | 0.314, 0.304   |
|        |                 |                |                 |                | R-OC, OC-R, OC-R | 0.320, 0.309   |
|        |                 |                |                 |                |                  |                |
|        | R-R, R-R, R-SC  | 0.266, 0.262   | R-SC, R-R, R-SC | 0.294, 0.281   | R-OC, R-SC, OC-R | 0.299, 0.297   |
|        |                 |                | SC-R, R-R, R-SC | 0.303, 0.287   | R-OC, SC-R, OC-R | 0.314, 0.309   |
|        |                 |                | R-OC, R-R, R-SC | 0.302, 0.284   | R-SC, R-SC, OC-R | 0.318, 0.311   |
|        |                 |                | OC-R, R-R, R-SC | 0.303, 0.284   | R-SC, SC-R, OC-R | 0.321, 0.312   |
|        |                 |                |                 |                | R-SC, R-OC, OC-R | 0.296, 0.301   |
|        |                 |                |                 |                | R-SC, OC-R, OC-R | 0.300, 0.304   |

Table S2.  $U_{\max}$  values at the end of an active conductor after various failures for the structure with the original parameter set.

| Option | After failure 1 | $U_{\max}$ , V | After failure 2 | $U_{\max}$ , V | After failure 3  | $U_{\max}$ , V |
|--------|-----------------|----------------|-----------------|----------------|------------------|----------------|
| 1      | R-OC, R-R, R-R  | 0.513          | R-OC, R-OC, R-R | 0.511          | R-OC, R-OC, R-OC | 0.509          |
|        |                 |                |                 |                | R-OC, OC-R, R-OC | 0.509          |
|        |                 |                | R-OC, OC-R, R-R | 0.513          | R-OC, R-SC, R-OC | 0.513          |
|        |                 |                | R-OC, R-SC, R-R | 0.515          | R-OC, SC-R, R-OC | 0.513          |
|        |                 |                |                 |                | R-SC, R-SC, R-OC | 0.492          |
|        |                 |                | R-OC, SC-R, R-R | 0.513          | R-SC, SC-R, R-OC | 0.496          |
|        | R-SC, R-R, R-R  | 0.492          | R-SC, R-SC, R-R | 0.490          | R-SC, R-OC, R-OC | 0.496          |
|        |                 |                | R-SC, SC-R, R-R | 0.492          | R-SC, OC-R, R-OC | 0.492          |
|        |                 |                | R-SC, R-OC, R-R | 0.494          | R-OC, R-OC, R-SC | 0.513          |
|        |                 |                |                 |                | R-OC, OC-R, R-SC | 0.517          |
|        |                 |                | R-SC, OC-R, R-R | 0.492          | R-OC, R-SC, R-SC | 0.517          |
|        |                 |                |                 |                | R-OC, SC-R, R-SC | 0.513          |
| 2      | R-R, R-OC, R-R  | 0.502          | R-R, R-OC, R-OC | 0.502          | R-SC, R-SC, R-SC | 0.487          |
|        |                 |                | R-R, R-OC, OC-R | 0.500          | R-SC, SC-R, R-SC | 0.488          |
|        |                 |                | R-R, R-OC, R-SC | 0.502          | R-SC, R-OC, R-SC | 0.492          |
|        |                 |                |                 |                | R-SC, OC-R, R-SC | 0.492          |
|        |                 |                | R-R, R-OC, SC-R | 0.505          | R-OC, R-OC, SC-R | 0.513          |
|        | R-R, R-SC, R-R  | 0.502          | R-R, R-SC, R-SC | 0.502          | R-OC, OC-R, SC-R | 0.513          |
|        |                 |                | R-R, R-SC, SC-R | 0.500          | R-OC, R-SC, SC-R | 0.513          |
|        |                 |                | R-R, R-SC, R-OC | 0.502          | R-OC, SC-R, SC-R | 0.513          |
|        |                 |                |                 |                | R-SC, R-SC, SC-R | 0.488          |
|        |                 |                | R-R, R-SC, OC-R | 0.505          | R-SC, SC-R, SC-R | 0.492          |
| 3      | R-R, R-R, R-OC  | 0.502          | R-OC, R-R, R-OC | 0.511          | R-SC, R-OC, SC-R | 0.496          |
|        |                 |                | OC-R, R-R, R-OC | 0.513          | R-SC, OC-R, SC-R | 0.492          |
|        |                 |                | R-SC, R-R, R-OC | 0.494          | R-OC, R-OC, OC-R | 0.509          |
|        |                 |                |                 |                | R-OC, OC-R, OC-R | 0.513          |
|        |                 |                | SC-R, R-R, R-OC | 0.492          | R-OC, R-SC, OC-R | 0.517          |
|        | R-R, R-R, R-SC  | 0.502          | R-SC, R-R, R-SC | 0.490          | R-OC, SC-R, OC-R | 0.513          |
|        |                 |                | SC-R, R-R, R-SC | 0.492          | R-SC, R-SC, OC-R | 0.492          |
|        |                 |                | R-OC, R-R, R-SC | 0.515          | R-SC, SC-R, OC-R | 0.492          |
|        |                 |                |                 |                | R-SC, R-OC, OC-R | 0.492          |
|        |                 |                | OC-R, R-R, R-SC | 0.513          | R-SC, OC-R, OC-R | 0.492          |

Table S3.  $U_{\max}$  values at the end of an active conductor after various failures for the structure with the optimized parameter set.

| Option | After failure 1   | $U_{\max}$ , V | After failure 2    | $U_{\max}$ , V | After failure 3     | $U_{\max}$ , V |
|--------|-------------------|----------------|--------------------|----------------|---------------------|----------------|
| 1      | R-OC, A, R-R, R-R | 0.482          | R-OC, A, R-R, R-OC | 0.469          | R-OC, R-OC, A, R-OC | 0.554          |
|        |                   |                |                    |                | R-OC, OC-R, A, R-OC | 0.555          |
|        |                   |                | R-SC, A, R-R, R-SC | 0.524          | R-OC, R-SC, A, R-OC | 0.569          |
|        |                   |                | R-OC, A, R-R, OC-R | 0.471          | R-OC, SC-R, A, R-OC | 0.569          |
|        |                   |                | R-SC, A, R-R, SC-R | 0.527          | R-SC, R-SC, A, R-OC | 0.619          |
|        |                   |                |                    |                | R-SC, SC-R, A, R-OC | 0.618          |
|        | R-SC, A, R-R, R-R | 0.517          | R-OC, A, R-R, R-SC | 0.493          | R-SC, R-OC, A, R-OC | 0.603          |
|        |                   |                | R-SC, A, R-R, R-OC | 0.509          | R-SC, OC-R, A, R-OC | 0.604          |
|        |                   |                | R-OC, A, R-R, SC-R | 0.491          | R-OC, R-OC, A, R-SC | 0.560          |
|        |                   |                | R-SC, A, R-R, OC-R | 0.505          | R-OC, OC-R, A, R-SC | 0.559          |
|        |                   |                |                    |                | R-OC, R-SC, A, R-SC | 0.572          |
|        |                   |                |                    |                |                     |                |
| 2      | R-OC, R-R, A, R-R | 0.766          | R-OC, R-R, A, R-OC | 0.763          | R-OC, SC-R, A, R-SC | 0.573          |
|        |                   |                | R-SC, R-R, A, R-SC | 0.721          | R-SC, R-SC, A, R-SC | 0.620          |
|        |                   |                | R-OC, R-R, A, OC-R | 0.762          | R-SC, SC-R, A, R-SC | 0.622          |
|        |                   |                | R-SC, R-R, A, SC-R | 0.721          | R-SC, R-OC, A, R-SC | 0.608          |
|        |                   |                |                    |                | R-SC, OC-R, A, R-SC | 0.607          |
|        |                   |                |                    |                |                     |                |
|        | R-SC, R-R, A, R-R | 0.718          | R-OC, R-R, A, R-SC | 0.769          | R-OC, R-OC, A, SC-R | 0.559          |
|        |                   |                | R-SC, R-R, A, R-OC | 0.715          | R-OC, OC-R, A, SC-R | 0.560          |
|        |                   |                | R-OC, R-R, A, SC-R | 0.769          | R-OC, R-SC, A, SC-R | 0.573          |
|        |                   |                | R-SC, R-R, A, OC-R | 0.715          | R-OC, SC-R, A, SC-R | 0.572          |
|        |                   |                |                    |                | R-SC, R-SC, A, SC-R | 0.622          |
|        |                   |                |                    |                |                     |                |
| 3      | R-OC, R-R, R-R, A | 0.477          | –                  | –              | R-SC, SC-R, A, SC-R | 0.621          |
|        |                   |                | –                  | –              | R-SC, R-OC, A, SC-R | 0.607          |
|        |                   |                | –                  | –              | R-SC, OC-R, A, SC-R | 0.608          |
|        |                   |                | –                  | –              | R-OC, R-OC, A, OC-R | 0.556          |
|        |                   |                |                    |                | R-OC, OC-R, A, OC-R | 0.555          |
|        |                   |                |                    |                |                     |                |
|        | R-SC, R-R, R-R, A | 0.507          | –                  | –              | R-OC, R-SC, A, OC-R | 0.569          |
|        |                   |                | –                  | –              | R-OC, SC-R, A, OC-R | 0.570          |
|        |                   |                | –                  | –              | R-SC, R-SC, A, OC-R | 0.618          |
|        |                   |                | –                  | –              | R-SC, SC-R, A, OC-R | 0.619          |
|        |                   |                | –                  | –              | R-SC, R-OC, A, OC-R | 0.604          |
|        |                   |                | –                  | –              | R-SC, OC-R, A, OC-R | 0.603          |

Table S4.  $U_{\max}$  values at the end of an active conductor after various failures for the structure with parameter sets 1, 2, 3.

| Option | After failure 1 | $U_{\max}$ , V      | After failure 2 | $U_{\max}$ , V      | After failure 3  | $U_{\max}$ , V      |
|--------|-----------------|---------------------|-----------------|---------------------|------------------|---------------------|
| 1      | R-OC, R-R, R-R  | 0.259, 0.268, 0.284 | R-OC, R-OC, R-R | 0.287, 0.29, 0.285  | R-OC, R-OC, R-OC | 0.323, 0.333, 0.322 |
|        |                 |                     |                 |                     | R-OC, OC-R, R-OC | 0.318, 0.324, 0.313 |
|        |                 |                     | R-OC, OC-R, R-R | 0.286, 0.289, 0.284 | R-OC, R-SC, R-OC | 0.305, 0.308, 0.307 |
|        |                 |                     | R-OC, R-SC, R-R | 0.316, 0.320, 0.321 | R-OC, SC-R, R-OC | 0.302, 0.303, 0.302 |
|        |                 |                     | R-OC, SC-R, R-R | 0.324, 0.329, 0.326 | R-SC, R-SC, R-OC | 0.316, 0.313, 0.317 |
|        |                 |                     |                 |                     | R-SC, SC-R, R-OC | 0.334, 0.335, 0.333 |
|        | R-SC, R-R, R-R  | 0.27, 0.284, 0.286  | R-SC, R-SC, R-R | 0.308, 0.303, 0.305 | R-SC, R-OC, R-OC | 0.325, 0.326, 0.309 |
|        |                 |                     | R-SC, SC-R, R-R | 0.318, 0.317, 0.315 | R-SC, OC-R, R-OC | 0.328, 0.330, 0.314 |
|        |                 |                     | R-SC, R-OC, R-R | 0.335, 0.339, 0.322 | R-OC, R-OC, R-SC | 0.318, 0.312, 0.281 |
|        |                 |                     | R-SC, OC-R, R-R | 0.338, 0.344, 0.328 | R-OC, OC-R, R-SC | 0.317, 0.310, 0.278 |
|        |                 |                     |                 |                     | R-OC, R-SC, R-SC | 0.325, 0.333, 0.334 |
|        |                 |                     | R-R, R-OC, R-OC | 0.290, 0.285, 0.274 | R-OC, SC-R, R-SC | 0.343, 0.355, 0.35  |
| 2      | R-R, R-OC, R-R  | 0.311, 0.305, 0.287 | R-R, R-OC, OC-R | 0.289, 0.280, 0.268 | R-SC, R-SC, R-SC | 0.298, 0.291, 0.292 |
|        |                 |                     | R-R, R-OC, R-SC | 0.331, 0.331, 0.308 | R-SC, SC-R, R-SC | 0.299, 0.294, 0.297 |
|        |                 |                     | R-R, R-OC, SC-R | 0.332, 0.333, 0.309 | R-SC, R-OC, R-SC | 0.347, 0.353, 0.336 |
|        |                 |                     |                 |                     | R-SC, OC-R, R-SC | 0.350, 0.359, 0.342 |
|        |                 |                     | R-R, R-SC, R-SC | 0.308, 0.307, 0.298 | R-OC, R-OC, SC-R | 0.306, 0.298, 0.271 |
|        |                 |                     | R-R, R-SC, SC-R | 0.318, 0.321, 0.308 | R-OC, OC-R, SC-R | 0.302, 0.292, 0.275 |
|        | R-R, R-SC, R-R  | 0.298, 0.294, 0.286 | R-R, R-SC, R-OC | 0.304, 0.295, 0.291 | R-OC, R-SC, SC-R | 0.338, 0.349, 0.346 |
|        |                 |                     | R-R, R-SC, OC-R | 0.312, 0.304, 0.297 | R-OC, SC-R, SC-R | 0.335, 0.343, 0.341 |
|        |                 |                     |                 |                     | R-SC, R-SC, SC-R | 0.299, 0.290, 0.281 |
|        |                 |                     | R-OC, R-R, R-OC | 0.254, 0.268, 0.273 | R-SC, SC-R, SC-R | 0.305, 0.299, 0.297 |
|        |                 |                     | OC-R, R-R, R-OC | 0.244, 0.258, 0.267 | R-SC, R-OC, SC-R | 0.358, 0.369, 0.348 |
|        |                 |                     | R-SC, R-R, R-OC | 0.267, 0.273, 0.290 | R-SC, OC-R, SC-R | 0.361, 0.373, 0.352 |
| 3      | R-R, R-R, R-OC  | 0.25, 0.248, 0.259  | SC-R, R-R, R-OC | 0.272, 0.279, 0.296 | R-OC, R-OC, OC-R | 0.306, 0.314, 0.307 |
|        |                 |                     |                 |                     | R-OC, OC-R, OC-R | 0.309, 0.318, 0.313 |
|        |                 |                     | R-SC, R-R, R-SC | 0.279, 0.296, 0.298 | R-OC, R-SC, OC-R | 0.296, 0.293, 0.296 |
|        |                 |                     |                 |                     | R-OC, SC-R, OC-R | 0.313, 0.316, 0.313 |
|        |                 |                     | SC-R, R-R, R-SC | 0.289, 0.309, 0.308 | R-SC, R-SC, OC-R | 0.329, 0.329, 0.329 |
|        |                 |                     | R-OC, R-R, R-SC | 0.275, 0.289, 0.305 | R-SC, SC-R, OC-R | 0.331, 0.333, 0.333 |
|        | R-R, R-R, R-SC  | 0.266, 0.274, 0.269 | OC-R, R-R, R-SC | 0.277, 0.292, 0.306 | R-SC, R-OC, OC-R | 0.312, 0.310, 0.297 |
|        |                 |                     |                 |                     | R-SC, OC-R, OC-R | 0.316, 0.316, 0.303 |

Table S5.  $U_{\max}$  values at the end of an active conductor after various failures for the structure with the optimized parameter set.

| Option | After failure 1 | $U_{\max}$ , V | After failure 2 | $U_{\max}$ , V | After failure 3  | $U_{\max}$ , V |
|--------|-----------------|----------------|-----------------|----------------|------------------|----------------|
| 1      | R-OC, R-R, R-R  | 0.282          | R-OC, R-OC, R-R | 0.293          | R-OC, R-OC, R-OC | 0.345          |
|        |                 |                |                 |                | R-OC, OC-R, R-OC | 0.330          |
|        |                 |                | R-OC, OC-R, R-R | 0.291          | R-OC, R-SC, R-OC | 0.322          |
|        |                 |                | R-OC, R-SC, R-R | 0.334          | R-OC, SC-R, R-OC | 0.312          |
|        |                 |                |                 |                | R-SC, R-SC, R-OC | 0.308          |
|        |                 |                | R-OC, SC-R, R-R | 0.344          | R-SC, SC-R, R-OC | 0.337          |
|        | R-SC, R-R, R-R  | 0.293          | R-SC, R-SC, R-R | 0.299          | R-SC, R-OC, R-OC | 0.325          |
|        |                 |                | R-SC, SC-R, R-R | 0.319          | R-SC, OC-R, R-OC | 0.334          |
|        |                 |                | R-SC, R-OC, R-R | 0.337          | R-OC, R-OC, R-SC | 0.291          |
|        |                 |                |                 |                | R-OC, OC-R, R-SC | 0.288          |
|        |                 |                | R-SC, OC-R, R-R | 0.347          | R-OC, R-SC, R-SC | 0.348          |
|        |                 |                |                 |                | R-OC, SC-R, R-SC | 0.379          |
| 2      | R-R, R-OC, R-R  | 0.287          | R-R, R-OC, R-OC | 0.281          | R-SC, R-SC, R-SC | 0.288          |
|        |                 |                | R-R, R-OC, OC-R | 0.273          | R-SC, SC-R, R-SC | 0.295          |
|        |                 |                | R-R, R-OC, R-SC | 0.317          | R-SC, R-OC, R-SC | 0.352          |
|        |                 |                |                 |                | R-SC, OC-R, R-SC | 0.364          |
|        |                 |                | R-R, R-OC, SC-R | 0.320          | R-OC, R-OC, SC-R | 0.274          |
|        | R-R, R-SC, R-R  | 0.294          | R-R, R-SC, R-SC | 0.308          | R-OC, OC-R, SC-R | 0.280          |
|        |                 |                | R-R, R-SC, SC-R | 0.328          | R-OC, R-SC, SC-R | 0.373          |
|        |                 |                | R-R, R-SC, R-OC | 0.283          | R-OC, SC-R, SC-R | 0.361          |
|        |                 |                |                 |                | R-SC, R-SC, SC-R | 0.273          |
|        |                 |                | R-R, R-SC, OC-R | 0.290          | R-SC, SC-R, SC-R | 0.295          |
| 3      | R-R, R-R, R-OC  | 0.238          | R-OC, R-R, R-OC | 0.279          | R-SC, R-OC, SC-R | 0.376          |
|        |                 |                | OC-R, R-R, R-OC | 0.270          | R-SC, OC-R, SC-R | 0.383          |
|        |                 |                | R-SC, R-R, R-OC | 0.282          | R-OC, R-OC, OC-R | 0.321          |
|        |                 |                |                 |                | R-OC, OC-R, OC-R | 0.329          |
|        |                 |                | SC-R, R-R, R-OC | 0.287          | R-OC, R-SC, OC-R | 0.301          |
|        | R-R, R-R, R-SC  | 0.271          | R-SC, R-R, R-SC | 0.307          | R-OC, SC-R, OC-R | 0.331          |
|        |                 |                | SC-R, R-R, R-SC | 0.327          | R-SC, R-SC, OC-R | 0.329          |
|        |                 |                | R-OC, R-R, R-SC | 0.311          | R-SC, SC-R, OC-R | 0.337          |
|        |                 |                |                 |                | R-SC, R-OC, OC-R | 0.304          |
|        |                 |                | OC-R, R-R, R-SC | 0.315          | R-SC, OC-R, OC-R | 0.315          |

Table S6.  $U_{\max}$  values at the end of an active conductor after various failures for the structure with the original and optimized parameter sets.

| Option | After failure 1 | $U_{\max}$ , V | After failure 2 | $U_{\max}$ , V | After failure 3  | $U_{\max}$ , V |
|--------|-----------------|----------------|-----------------|----------------|------------------|----------------|
| 1      | R-OC, R-R, R-R  | 0.292, 0.277   | R-OC, R-OC, R-R | 0.280, 0.290   | R-OC, R-OC, R-OC | 0.273, 0.352   |
|        |                 |                |                 |                | R-OC, OC-R, R-OC | 0.253, 0.332   |
|        |                 |                | R-OC, OC-R, R-R | 0.270, 0.287   | R-OC, R-SC, R-OC | 0.335, 0.320   |
|        |                 |                | R-OC, R-SC, R-R | 0.352, 0.333   | R-OC, SC-R, R-OC | 0.326, 0.308   |
|        |                 |                |                 |                | R-SC, R-SC, R-OC | 0.340, 0.305   |
|        |                 |                | R-OC, SC-R, R-R | 0.370, 0.345   | R-SC, SC-R, R-OC | 0.374, 0.341   |
|        | R-SC, R-R, R-R  | 0.280, 0.293   | R-SC, R-SC, R-R | 0.328, 0.296   | R-SC, R-OC, R-OC | 0.351, 0.325   |
|        |                 |                | R-SC, SC-R, R-R | 0.346, 0.320   | R-SC, OC-R, R-OC | 0.360, 0.335   |
|        |                 |                | R-SC, R-OC, R-R | 0.367, 0.338   | R-OC, R-OC, R-SC | 0.333, 0.293   |
|        |                 |                |                 |                | R-OC, OC-R, R-SC | 0.329, 0.292   |
|        |                 |                | R-SC, OC-R, R-R | 0.377, 0.350   | R-OC, R-SC, R-SC | 0.363, 0.349   |
|        |                 |                |                 |                |                  |                |
| 2      | R-R, R-OC, R-R  | 0.330, 0.283   | R-R, R-OC, R-OC | 0.291, 0.280   | R-OC, SC-R, R-SC | 0.397, 0.389   |
|        |                 |                | R-R, R-OC, OC-R | 0.289, 0.271   | R-SC, R-SC, R-SC | 0.318, 0.280   |
|        |                 |                | R-R, R-OC, R-SC | 0.359, 0.319   | R-SC, SC-R, R-SC | 0.321, 0.289   |
|        |                 |                |                 |                | R-SC, R-OC, R-SC | 0.381, 0.355   |
|        |                 |                | R-R, R-OC, SC-R | 0.362, 0.325   | R-SC, OC-R, R-SC | 0.392, 0.369   |
|        |                 |                |                 |                |                  |                |
|        | R-R, R-SC, R-R  | 0.312, 0.291   | R-R, R-SC, R-SC | 0.325, 0.308   | R-OC, R-OC, SC-R | 0.308, 0.274   |
|        |                 |                | R-R, R-SC, SC-R | 0.343, 0.334   | R-OC, OC-R, SC-R | 0.292, 0.284   |
|        |                 |                | R-R, R-SC, R-OC | 0.323, 0.279   | R-OC, R-SC, SC-R | 0.386, 0.381   |
|        |                 |                |                 |                | R-OC, SC-R, SC-R | 0.385, 0.363   |
|        |                 |                | R-R, R-SC, OC-R | 0.341, 0.289   | R-SC, R-SC, SC-R | 0.308, 0.270   |
|        |                 |                |                 |                |                  |                |
| 3      | R-R, R-R, R-OC  | 0.269, 0.232   | R-OC, R-R, R-OC | 0.257, 0.279   | R-SC, SC-R, SC-R | 0.326, 0.289   |
|        |                 |                | OC-R, R-R, R-OC | 0.255, 0.269   | R-SC, R-OC, SC-R | 0.400, 0.387   |
|        |                 |                | R-SC, R-R, R-OC | 0.294, 0.282   | R-SC, OC-R, SC-R | 0.409, 0.393   |
|        |                 |                |                 |                | R-OC, R-OC, OC-R | 0.245, 0.323   |
|        |                 |                | SC-R, R-R, R-OC | 0.307, 0.286   | R-OC, OC-R, OC-R | 0.238, 0.333   |
|        |                 |                |                 |                |                  |                |
|        | R-R, R-R, R-SC  | 0.270, 0.272   | R-SC, R-R, R-SC | 0.291, 0.310   | R-OC, R-SC, OC-R | 0.308, 0.295   |
|        |                 |                |                 |                | R-OC, SC-R, OC-R | 0.351, 0.331   |
|        |                 |                | SC-R, R-R, R-SC | 0.307, 0.337   | R-SC, R-SC, OC-R | 0.367, 0.329   |
|        |                 |                | R-OC, R-R, R-SC | 0.313, 0.312   | R-SC, SC-R, OC-R | 0.369, 0.341   |
|        |                 |                |                 |                | R-SC, R-OC, OC-R | 0.321, 0.298   |
|        |                 |                | OC-R, R-R, R-SC | 0.32, 0.318    | R-SC, OC-R, OC-R | 0.332, 0.312   |
